# Supplementary material for: Intrinsic and extrinsic proton conductivity in metal-organic frameworks
Source: Royal Society of Chemistry journal article supplement (doi:10.1039/c4ra11473f), 2014-01-01
Supplement: c4ra11473f1.pdf [file c4ra11473f1.pdf]

## Supporting Information

# Intrinsic and Extrinsic Proton Conductivity in Metal-Organic Frameworks

S. Tominaka,<sup>a,b\*</sup> and A. K. Cheetham<sup>a\*</sup>

<sup>a</sup> *Department of Materials Science and Metallurgy, University of Cambridge, Charles Babbage Road, Cambridge CB3 0FS, United Kingdom. Fax: +44 1223 334567; Tel: +44 (0)1223 767061; E-mail: akc30@cam.ac.uk.*

<sup>b</sup> *International Center for Materials Nanoarchitectonics (WPI-MANA), National Institute for Materials Science (NIMS), Ibaraki 305-0044, Japan. Tel: +81 (0)29 860 4594; E-mail: TOMINAKA.Satoshi@nims.go.jp*

## Contents

- S1. Experimental details
- S2. Single crystal diffraction data
- S3. Pawley fitting of PXRD patterns
- S4. Crystal structure of TTF nitrate
- S5. Single-crystal AC impedance data
- S6. Hydrogen bond networks in [Fe(ox)(H<sub>2</sub>O)<sub>2</sub>]
- S7. Powder AC impedance data and analyses
- S8. Data for plotting Figure 4
- S9. Thermogravimetric analyses

## S1. Experimental details

**Structure determinations.** The crystal structure was determined by single crystal diffraction using an Oxford Diffraction Gemini A Ultra X-ray diffractometer with Mo K $\alpha$  radiation ( $\lambda = 0.71073$  Å) operated at 50 kV and 40 mA. Data were collected under ambient conditions. Data collection, unit cell determination and refinement, absorption correction and data reduction were performed using the CrysAlisPro software from Agilent Technologies. An analytical absorption correction was performed by applying a face-based absorption correction as well as a spherical absorption correction.

The unit cell of **1** was indexed using twin finding function of the CrysAlisPro software. Then, the best matched cell was used for structure solution. The unit cell of **2** was indexed according to the reported lattice values of [Fe(ox)(H<sub>2</sub>O)<sub>2</sub>].<sup>1</sup> Then, the data was reduced on the basis of the C2/c space group.

The Alert level A of the cif file of **2** is due to the presence of stacking faults (low quality data). The Alert level B of **1**, the big uncertainty in beta angle, is due to the presence of overlap peaks between twins.

**Conductivity measurements.** Conductivities were measured by the AC impedance method using an electrochemical instrument (Gamry Interface 1000) in the frequency range of 1 MHz to 0.01 Hz at an AC amplitude of 100 mV. For the single crystal measurements, the crystals were physically contacted with two Au microelectrodes (200 nm thick) having a 80  $\mu$ m gap deposited on a SiO<sub>2</sub> chip as reported previously.<sup>2</sup> Using pressure sensitive silicone adhesive polyimide film (CMF-100-020W from MicroNova), crystals were gently picked up and mounted on the electrodes with their surface exposed to moisture. Humidity was controlled by mixing a water-saturated nitrogen gas and a dry nitrogen gas. The conductivity was measured along the long axis of crystals.

For the powder conductivity measurements, 100–130 mg of powder was gently ground using a pestle and mortar, and then was pressed into a pellet (1 cm $\phi$ , 0.6–0.7 mm thick) at 0.5 GPa with a few drops of water. After drying under ambient conditions, the pellet was mounted in a closed powder conductivity measurement cell with stainless steel electrodes (EQ-STC 10 mm, MTI Corporation, USA) under saturated water vapour. Considering the pH value of the [Fe(ox)(H<sub>2</sub>O)<sub>2</sub>]-saturated solution (pH = 6.5–6.8 at 22°C), these electrodes are considered to work as blocking electrodes. The temperature was controlled by keeping the cell in an oven. AC impedance spectra were collected after equilibration time of >8 h with monitoring impedance spectra. At the first point, 90°C, resistance decreased for more than 2 days and the impedance spectra became stable.

**AC impedance analyses.** Impedance spectra were analyzed by curve fitting with equivalent circuits using the EchemAnalyst software from Gamry using equivalent circuits. The capacitance is calculated from constant phase element ( $Z = Y^{-1}(j\omega)^{-\alpha}$ ), which is in general used for representing inhomogeneous response to the external electrical field. In order to obtain accurate conductivity values, impedance spectrum of the blank cell was measured (a resistance of 1.8  $\Omega$  with a series inductance of 1.7  $\mu$ H).

In the powder impedance data, the complicated features found in the range of  $10^{-2}$ – $10^4$  Hz have a big capacitance of  $>10^{-5}$  F (cf. the dry state has  $1.6 \times 10^{-10}$  F), these low frequency phenomena are attributable to electrode reactions, probably pseudo-capacitance of stainless steel electrodes. Thus, the impedance in the range of  $10^4$ – $10^6$  Hz is attributable to the bulk ion conduction. Since inductance originating from wires etc. has influence on this frequency range, in order to measure the resistance accurately, the spectra were analyzed by curve fitting using an equivalent circuit having a series inductance (Fig. S7).

Though the pressure does not affect, after the measurements, PXRD measurement indicates that **2** partially converted into **1**, as expected from the synthetic procedure (data not shown).

**Powder diffraction.** The PXRD samples were prepared by grinding the crystals gently using mortar and pestle for 1 min. The data was collected using a Bruker-AXS D8 diffractometer with Cu K $\alpha$  radiation ( $\lambda = 1.5418 \text{ \AA}$ ) in the Bragg–Brentano geometry. The patterns were analyzed by the Pawley fitting using the GSAS-II software,<sup>3</sup> and plotted with zero-shift correction and background subtraction.

**Thermal analyses.** Thermogravimetric analysis and differential scanning calorimetry were performed simultaneously using a TA Instruments Q600 SDT instrument with a nitrogen flow of 100 mL min<sup>-1</sup> at a heating rate of 5 °C min<sup>-1</sup>, from room temperature to 600°C.

**Solubility test.** 10 mg of **1** was soaked in 45 mL H<sub>2</sub>O at RT or 90°C for 20 hours, then 40 mL of supernatant was dried at 90°C in air. 2 mg of black precipitate was recovered from the 90°C-treated one, while negligible yellow precipitate could be recovered from RT-treated one (the supernatant pH = 6.5–6.8 at 22°C, probably dominated by carbonate in air).

**Synthesis of TTF nitrate.** The tetrathiafulvalene (TTF) nitrate crystals were prepared by the oxidation reaction of TTF (97%, Sigma-Aldrich) by nitric acid (50  $\mu$ L, 70%, Fisher) in N,N-dimethylformamide (DMF) (Fisher). In detail, TTF (20.5 mg) was dissolved in N,N-dimethylformamide (5 mL), and then was cooled down in a fridge (~6°C). Cooled nitric acid (~6°C) was gradually added to the solution, and then the solution was kept in the fridge for several days. Deep red needles, prisms and hexagonal plates were recovered by vacuum filtration, and rinsed with ethanol and chloroform. Though the morphologies are different, they have the same crystal structure, which was confirmed by single crystal X-ray diffraction and powder X-ray diffraction. The chemical composition was determined by elemental analysis at the Department of Chemistry, University of Cambridge (found, calcd., for C<sub>12</sub>H<sub>8</sub>N<sub>2</sub>O<sub>6</sub>S<sub>8</sub>): C (27.15, 27.06), H(1.59, 1.51) and N (4.98, 5.26). CIF files are available (CCDC 1020095 and 1020096).

## S2. Single crystal diffraction data

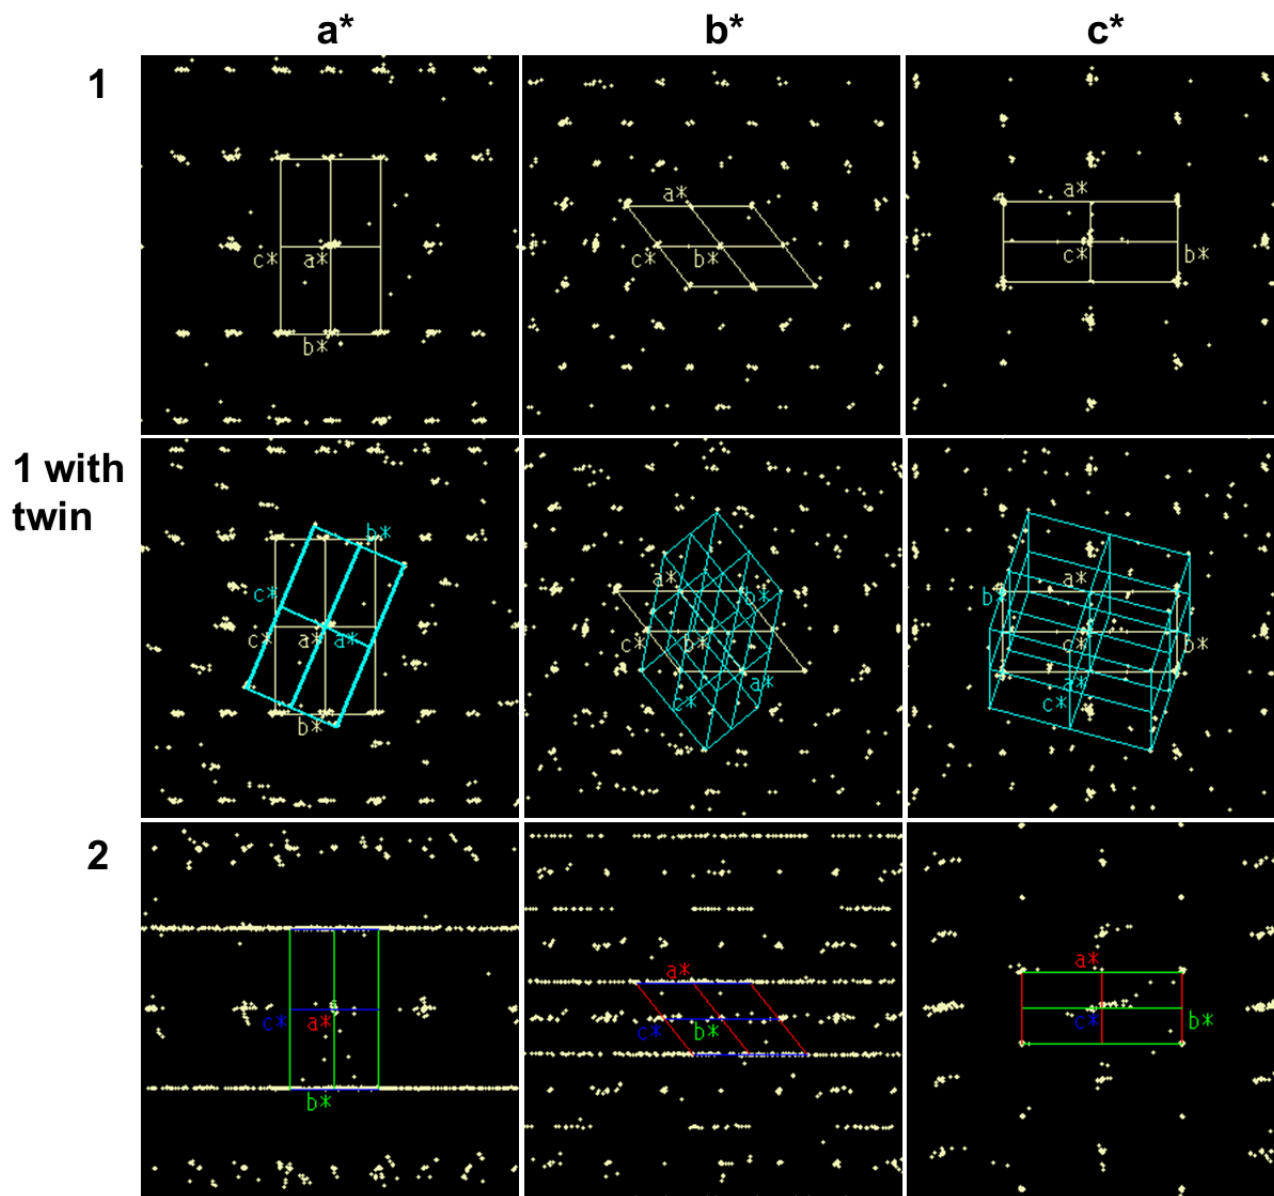

**Figure S1 | Ewald sphere images obtained by single crystal diffraction.** Top, sample 1. Middle, sample 2 with twin removal. Bottom, sample 2 (raw).

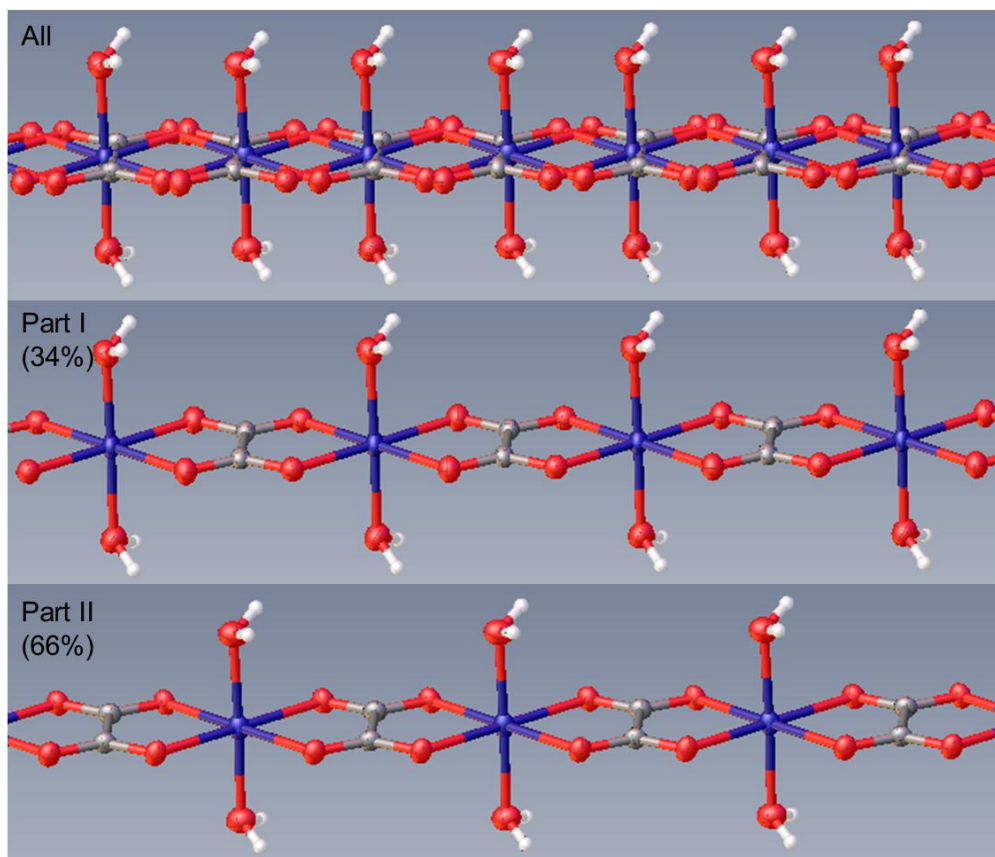

**Figure S2** | Atom connectivity of **2** determined by the single crystal diffraction.

### S3. Pawley fitting of PXRD patterns

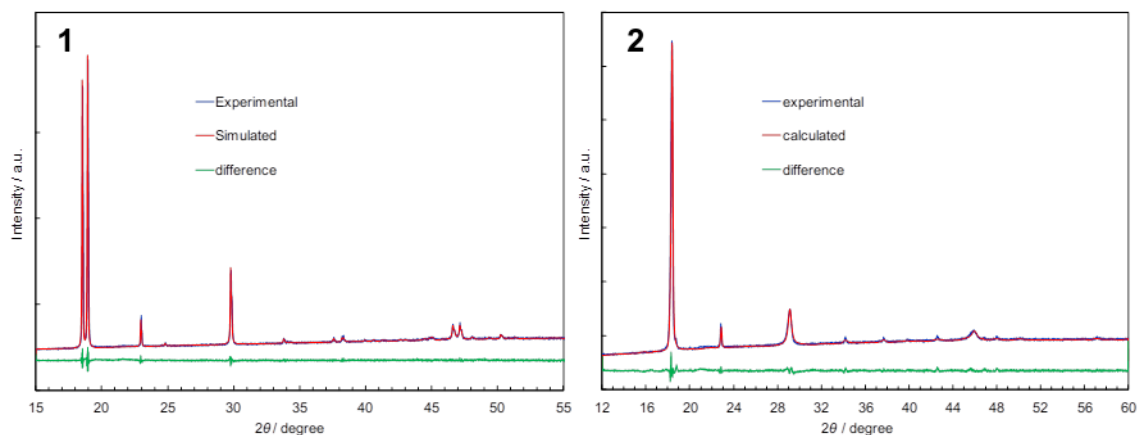

**Figure S3** | Pawley fitting of PXRD patterns of  $[\text{Fe}(\text{ox})(\text{H}_2\text{O})_2]$  **1** and **2**.

**Table S1** | Unit cells of  $[\text{Fe}(\text{ox})(\text{H}_2\text{O})_2]$  determined by X-ray diffraction

| Sample                 | <b>1</b>                                              | <b>1</b>                           | <b>2</b>                                              | <b>2</b>                           | Literature <sup>1</sup>                              |
|------------------------|-------------------------------------------------------|------------------------------------|-------------------------------------------------------|------------------------------------|------------------------------------------------------|
| Measurements           | SXRD (Mo $K\alpha$ )                                  | PXRD (Cu $K\alpha$ )               | SXRD (Mo $K\alpha$ )                                  | PXRD (Cu $K\alpha$ )               | SXRD (Mo $K\alpha$ )                                 |
| Crystal system         | Monoclinic                                            | Monoclinic                         | Monoclinic                                            | Monoclinic                         | Monoclinic                                           |
| Space group            | $C2/c$                                                | —                                  | $C2/c$                                                | —                                  | $C2/c$                                               |
| $a / \text{\AA}$       | 12.065(12)                                            | 12.0391(1)                         | 12.209(4)                                             | 12.2113(4)                         | 12.011(11)                                           |
| $b / \text{\AA}$       | 5.559(2)                                              | 5.5692(4)                          | 5.5526(7)                                             | 5.5527(1)                          | 5.557(5)                                             |
| $c / \text{\AA}$       | 9.817(9)                                              | 9.9393(1)                          | 9.865(3)                                              | 9.8658(2)                          | 9.920(9)                                             |
| $\beta (^{\circ})$     | 128.03(15)                                            | 128.5353(6)                        | 128.20(6)                                             | 128.207(2)                         | 128.53(3)                                            |
| $V / \text{\AA}^3$     | 518.6(13)                                             | 521.29(4)                          | 525.6(5)                                              | 525.65(2)                          | 518.0(8)                                             |
| $d / \text{g cm}^{-3}$ | 2.304                                                 | 2.292                              | 2.274                                                 | 2.273                              | 2.307                                                |
| Temperature            | 293                                                   | RT                                 | 297                                                   | RT                                 | 293                                                  |
| Goodness of fit        | $R_1 = 8.79\%$ ,<br>$wR_2 = 24.06\%$ ,<br>GOF = 1.307 | $R_w = 4.27\%$ ,<br>Pawley fitting | $R_1 = 10.9\%$ ,<br>$wR_2 = 25.78\%$ ,<br>GOF = 1.246 | $R_w = 3.23\%$ ,<br>Pawley fitting | $R_1 = 3.74\%$ ,<br>$wR_2 = 9.31\%$ ,<br>GOF = 1.387 |

#### S4. Crystal structure of TTF nitrate

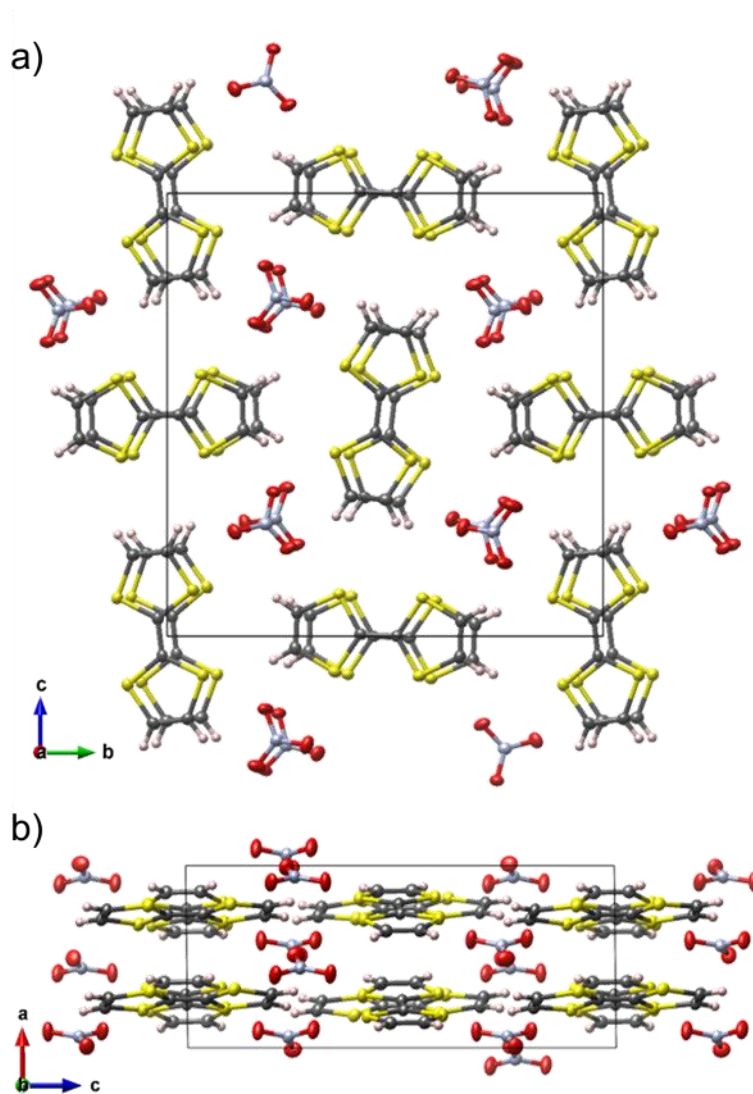

**Figure S4** | Crystal structure of TTF nitrate at 120 K.

## S5. Single-crystal AC impedance data

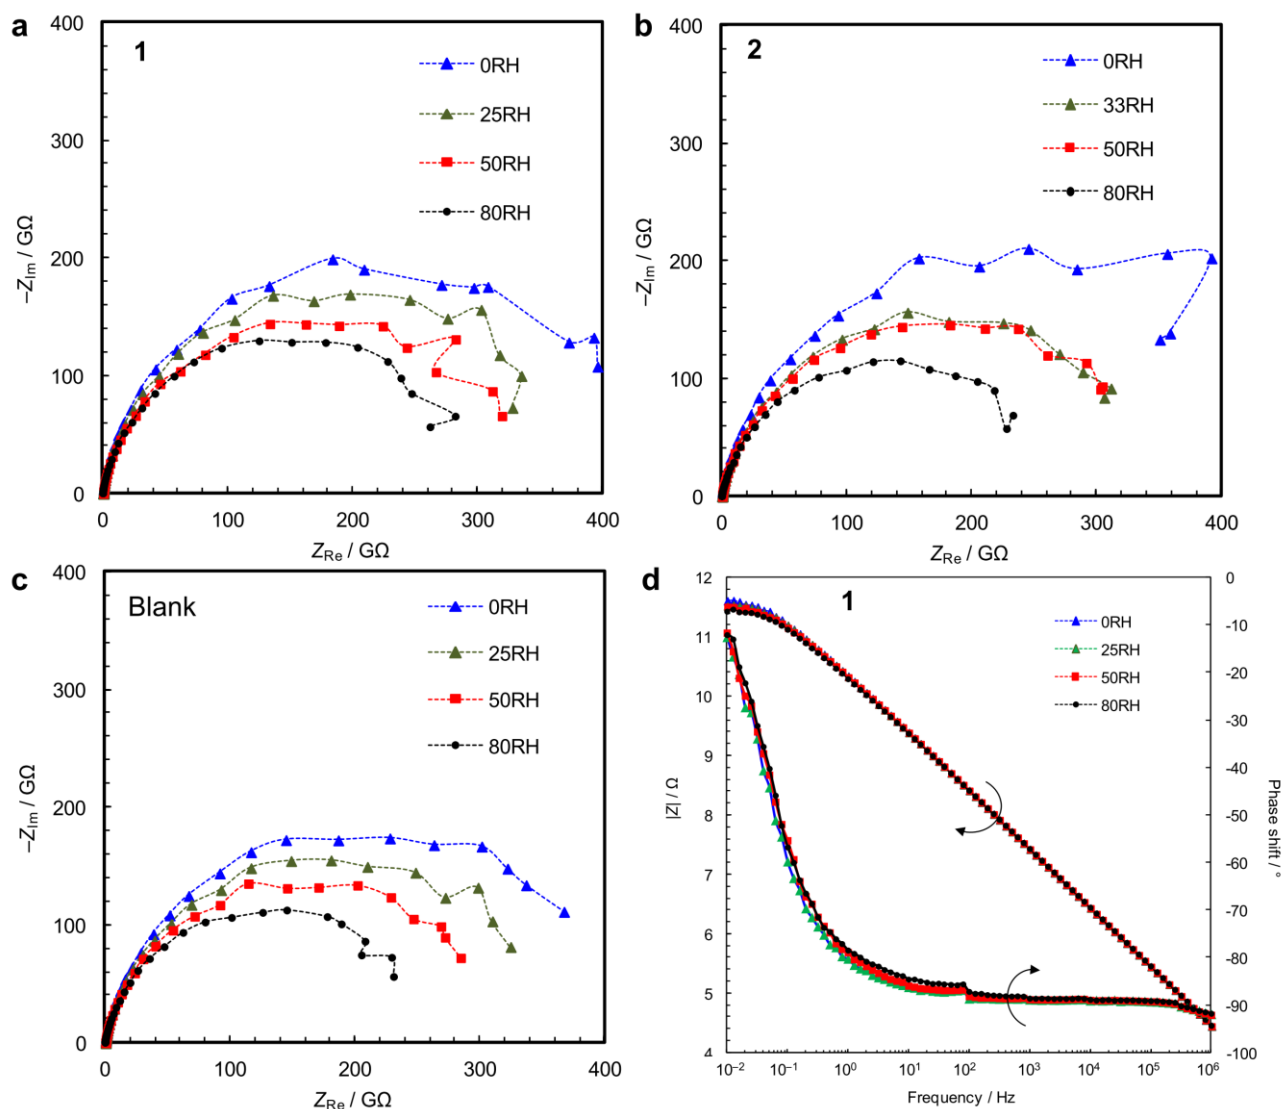

**Figure S5 | Single-crystal impedance data.** Complex-plane impedance diagrams of (a)  $[\text{Fe}(\text{ox})(\text{H}_2\text{O})_2]$  **1**, (b)  $[\text{Fe}(\text{ox})(\text{H}_2\text{O})_2]$  **2**, and (c) Blank cell. (d) Bode plot of **1**.

## S6. Hydrogen bond networks in [Fe(ox)(H<sub>2</sub>O)<sub>2</sub>]

The negligible conductivity through the framework of **1** can be accounted for by considering hydrogen bond networks as follows. The frequencies of O–H stretching bands in infrared spectra are an indicator of the strength of hydrogen bonds and can be correlated to the O–O distances in the O–H···O hydrogen bonds.<sup>4</sup> In broad terms, O–O distances in the range 2.7–2.95 Å are preferred for proton conduction,<sup>5</sup> and these show O–H stretching bands around 3200–3500 cm<sup>−1</sup>.<sup>4</sup> **1** contains such preferred hydrogen bonds having an O–O distance of 2.74 Å (Fig. S10a), to which the main sharp peak of O–H stretching at 3320 cm<sup>−1</sup> (Fig. S10b) can be assigned. However, they are localized between water molecules and oxalate molecules in different [Fe(ox)(H<sub>2</sub>O)<sub>2</sub>] chains as ox–H<sub>2</sub>O–ox units. For long-range conduction, proton transport through ox–H<sub>2</sub>O–ox units in the same chain is required. The O–O distance between water molecules and oxalate molecules in the same chains is 2.97–3.03 Å, to which the 3500 cm<sup>−1</sup> shoulder can be assignable. This distance is far longer than the requirements for good proton mobility, thus the protons are localized in the interchain hydrogen bonds, as indicated by the IR intensity.

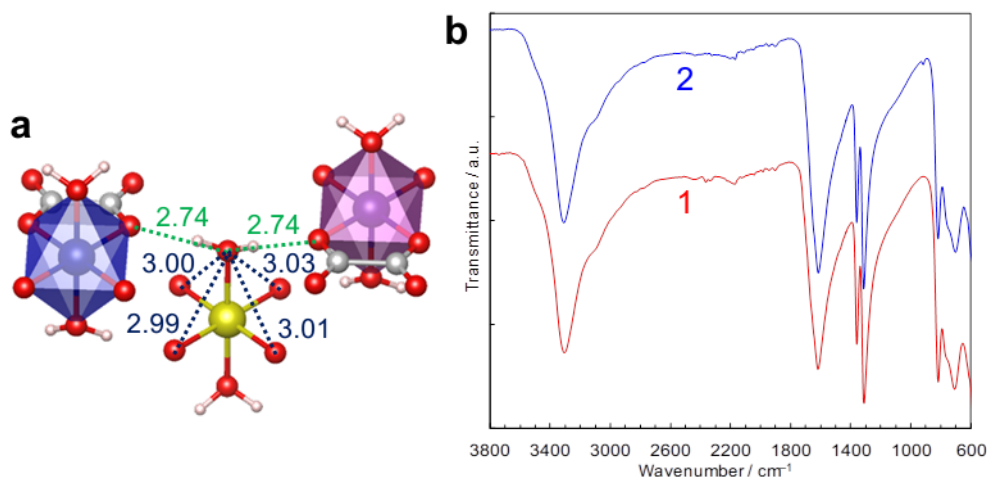

**Figure S6 | Potential proton conduction paths in the [Fe(ox)(H<sub>2</sub>O)<sub>2</sub>] framework. (a)** The O–O distances in **1** determined by single crystal diffraction (in Å). **(b)** FT-IR spectrum of **1** and **2**.

## S7. Powder AC impedance data and analyses

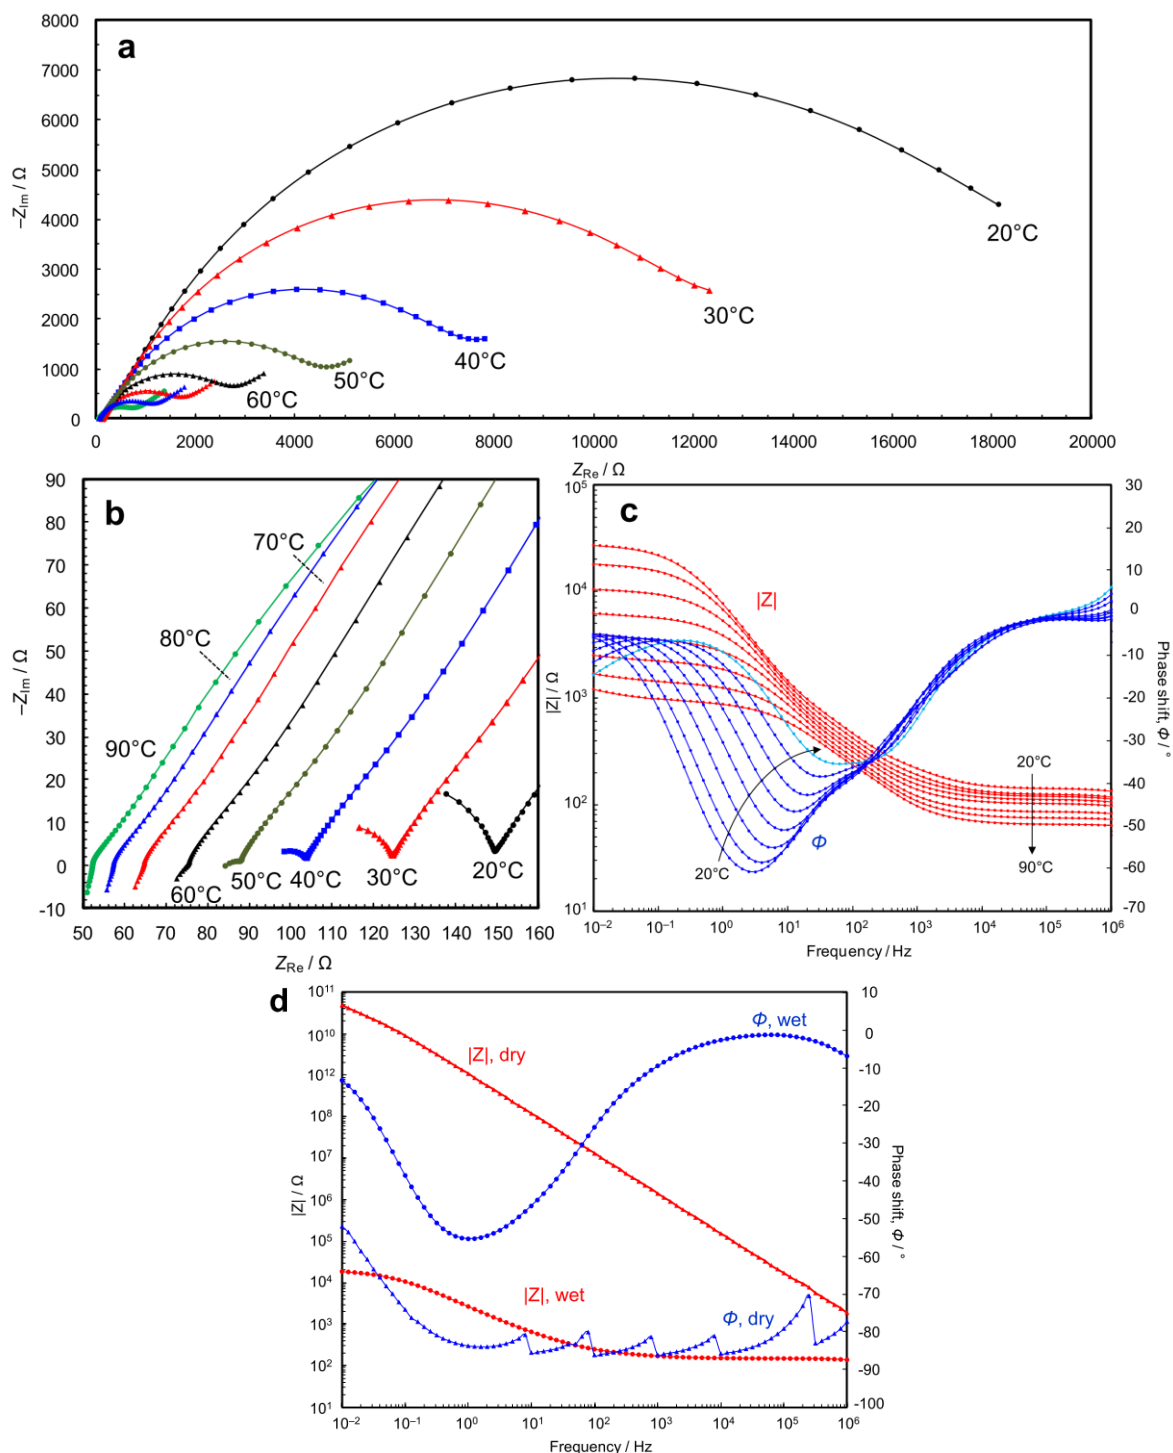

**Figure S7** | Powder impedance data of  $[\text{Fe}(\text{ox})(\text{H}_2\text{O})_2]$  1. **a,b** Complex-plane impedance diagrams. **c**, Bode plot, temperature dependence at 100%RH. **d**, Bode plot (20°C, 0%RH and 100%RH).

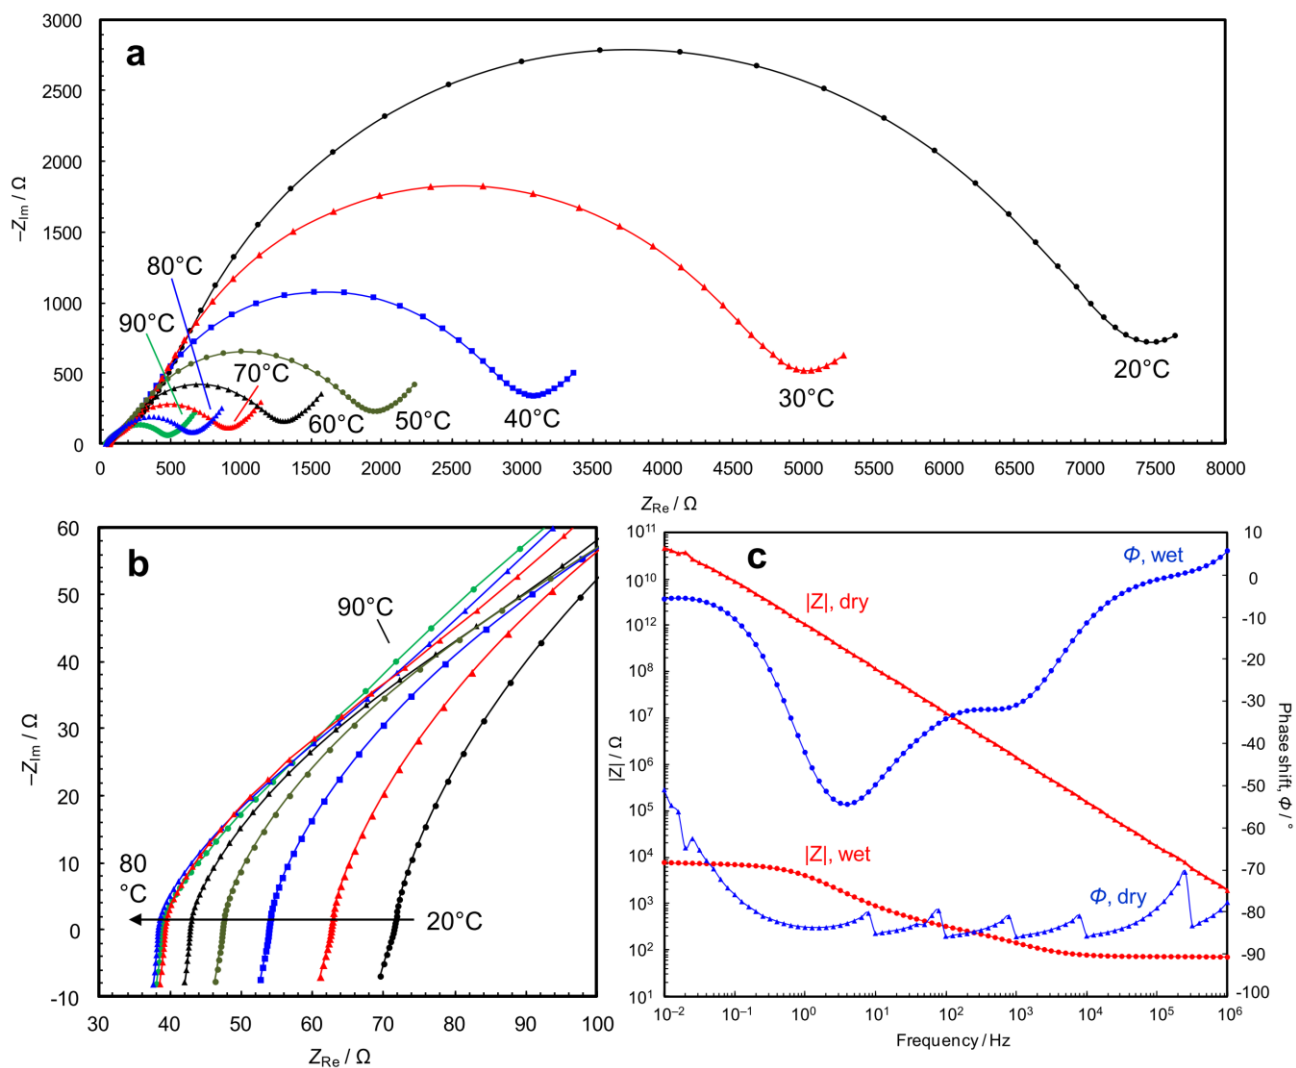

**Figure S8** | Powder impedance data of  $[\text{Fe}(\text{ox})(\text{H}_2\text{O})_2] \cdot 2$ . **a,b** Complex-plane impedance diagrams. **c**, Bode plot (20°C, 0%RH and 100%RH).

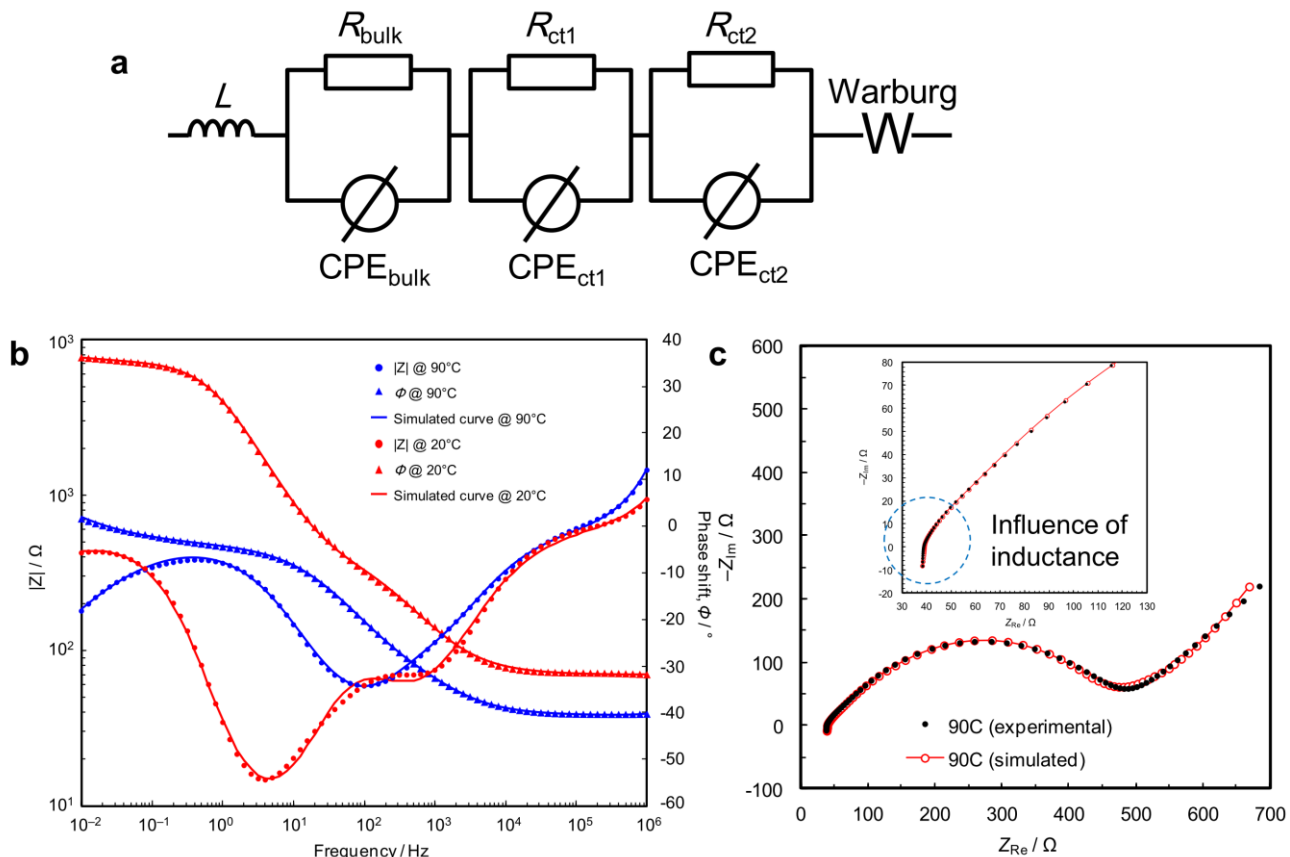

**Figure S9** | Impedance data analysis of  $[\text{Fe}(\text{ox})(\text{H}_2\text{O})_2] \mathbf{2}$  powder. **(a)** Equivalent circuit for representing bulk resistance  $R_{\text{bulk}}$  and capacitive behaviour  $\text{CPE}_{\text{bulk}}$  (CPE = constant phase element), two electrode reactions ( $R_{\text{ct1}}$ ,  $\text{CPE}_{\text{ct1}}$ ,  $R_{\text{ct2}}$  and  $\text{CPE}_{\text{ct2}}$ ) probably attributable to pseudo-capacitive reactions on stainless steel surface, and a Warburg Impedance for the diffusion term associated with the electrode reactions. A inductance is used for representing parasitic inductance from cables and cells. Curve fitting in the Bode plots **(b)** and in the complex-plane impedance diagram **(c)**. The high frequency region is often deformed due to the presence of the parasitic inductance, thus the use of inductance is important to obtain bulk resistance. The behaviour in this high frequency region,  $>10$  kHz, depends on the capacitance or  $\text{CPE}_{\text{bulk}}$  and  $L$ , it is better to include  $L$  even when the behaviour looks a semicircle.

## S8. Data for plotting Figure 5 and S8

There are two different Arrhenius equations,

$$\sigma T = \sigma_{01} \exp(-E_{a1}/RT) \quad \dots(1)$$

$$\sigma = \sigma_{02} \exp(-E_{a2}/RT) \quad \dots(2)$$

Where  $\sigma$  is conductivity,  $T$  is absolute temperature,  $E_a$  is activation energy, and  $R$  is the gas constant. The equation **1** is based on random theory, while equation **2** has not theoretical justification though it has been used widely.<sup>6</sup> Recently, equation **1** seems used more widely, especially in MOF community. In order to estimate  $\sigma_0$  and  $E_a$ , the following Arrhenius plots are used.

$$\text{Log}(\sigma T) = \text{Log}(\sigma_{01}) - E_{a2}/(2.303RT) \quad \dots(1')$$

$$\text{Log}(\sigma) = \text{Log}(\sigma_{02}) - E_{a2}/(2.303RT) \quad \dots(2')$$

By linear approximation of these plots, values of  $\sigma_0$  and  $E_a$  are obtained, but the values obtained using different plots are not exactly the same. The difference is the quasi-linear relation of  $\text{Log}(T)$  vs  $1/T$ , which can be approximated as linear in narrow temperature range. Table S2 summarizes the difference of  $\sigma_0$  and  $E_a$  in the different temperature range.

Using the values in Table S2, the  $\sigma_0$  and  $E_a$  values obtained using equation **2'** were converted and summarized in Table S3 and S4.

**Table S2** | Parameters for converting  $\sigma_0$  and activation energy obtained by two different styles of Arrhenius plots

| Temperature range (°C) | $\text{Log}(\sigma_{01}) - \text{Log}(\sigma_{02})$ | $(E_{a1} - E_{a2}) / \text{meV}$ | $R^2$  |
|------------------------|-----------------------------------------------------|----------------------------------|--------|
| 0–30                   | 2.893                                               | 24.8                             | 0.9998 |
| 0–60                   | 2.917                                               | 26.2                             | 0.9993 |
| 0–90                   | 2.934                                               | 27.1                             | 0.9986 |
| 0–100                  | 2.940                                               | 27.5                             | 0.9983 |
| 0–150                  | 2.968                                               | 29.2                             | 0.9967 |
| 0–200                  | 2.994                                               | 30.9                             | 0.9949 |
| 10–60                  | 2.922                                               | 26.5                             | 0.9995 |
| 10–90                  | 2.941                                               | 27.6                             | 0.9989 |
| 10–100                 | 2.955                                               | 28.5                             | 0.9987 |
| 10–150                 | 2.983                                               | 30.3                             | 0.9972 |
| 10–200                 | 3.001                                               | 31.5                             | 0.9955 |
| 20–60                  | 2.929                                               | 26.9                             | 0.9997 |
| 20–80                  | 2.948                                               | 28.1                             | 0.9994 |
| 20–90                  | 2.948                                               | 28.1                             | 0.9992 |
| 20–100                 | 2.955                                               | 28.5                             | 0.9990 |
| 20–150                 | 2.893                                               | 30.3                             | 0.9977 |
| 20–200                 | 3.009                                               | 32.0                             | 0.9961 |

**Table S3** |  $\sigma_0$  and  $E_a$  of MOF-based proton conductors.

| Name                                                                                                                   | Type      | $\text{Log}(\sigma_0 / \text{S cm}^{-1} \text{K}^{-1})$ | $E_a / \text{eV}$ | $\sigma / \text{S cm}^{-1}$ | $T / \text{K}$ | Reference (DOI)        |
|------------------------------------------------------------------------------------------------------------------------|-----------|---------------------------------------------------------|-------------------|-----------------------------|----------------|------------------------|
| [Fe(ox)(H <sub>2</sub> O) <sub>2</sub> ]( <b>1</b> )                                                                   | Dense     | 2.31                                                    | 0.17              | $5.7 \times 10^{-4}$        | 293            | This work              |
| [Fe(ox)(H <sub>2</sub> O) <sub>2</sub> ]( <b>2</b> )                                                                   | Dense     | 2.05                                                    | 0.14              | $1.5 \times 10^{-3}$        | 293            | This work              |
| [Fe(ox)(H <sub>2</sub> O) <sub>2</sub> ]                                                                               | Dense     | 5.84                                                    | 0.37              | $1.3 \times 10^{-3}$        | 298            | 10.1021/ja808681m      |
| [Mn(dhbq)(H <sub>2</sub> O) <sub>2</sub> ]                                                                             | Dense     | 2.45                                                    | 0.26              | $4.0 \times 10^{-5}$        | 300            | 10.1246/cl.2009.654    |
| (HOC <sub>2</sub> H <sub>4</sub> ) <sub>2</sub> -dtoa-Cu                                                               | Dense     | 0.01                                                    | 0.19              | $2.2 \times 10^{-6}$        | 300            | 10.1246/bcsj.52.3296   |
| (NH <sub>4</sub> ) <sub>2</sub> (adp)[Zn <sub>2</sub> (ox) <sub>3</sub> ]·3H <sub>2</sub> O                            | Layered   | 11.03                                                   | 0.63              | $8.0 \times 10^{-3}$        | 298            | 10.1021/ja9040016      |
| PCMOF3                                                                                                                 | Layered   | 1.31                                                    | 0.19              | $3.5 \times 10^{-5}$        | 298            | 10.1021/ja107035w      |
| Ca-SBBA                                                                                                                | Layered   | 1.30                                                    | 0.23              | $8.6 \times 10^{-6}$        | 298            | 10.1039/c2cc31135f     |
| Sr-SBBA                                                                                                                | Layered   | 7.59                                                    | 0.56              | $4.4 \times 10^{-5}$        | 298            | 10.1039/c2cc31135f     |
| [Al(OH)(14bdc)]·H <sub>2</sub> O, <b>MIL-53(Al)</b>                                                                    | Porous    | 2.78                                                    | 0.47              | $2.3 \times 10^{-8}$        | 298            | 10.1021/ja109810w      |
| [Al(OH)(14bdc-NH <sub>2</sub> )]·H <sub>2</sub> O, <b>MIL-53(Al)-NH<sub>2</sub></b>                                    | Porous    | 2.45                                                    | 0.45              | $2.3 \times 10^{-8}$        | 298            | 10.1021/ja109810w      |
| [Al(OH)(14bdc-OH)]·1.5H <sub>2</sub> O, <b>MIL-53(Al)-OH</b>                                                           | Porous    | 0.66                                                    | 0.27              | $4.2 \times 10^{-7}$        | 298            | 10.1021/ja109810w      |
| [Fe(OH)(14bdc-(CO <sub>2</sub> H) <sub>2</sub> )]·H <sub>2</sub> O,<br><b>MIL-53(Fe)-(CO<sub>2</sub>H)<sub>2</sub></b> | Porous    | 0.33                                                    | 0.21              | $2.0 \times 10^{-6}$        | 298            | 10.1021/ja109810w      |
| [Mo <sub>5</sub> P <sub>2</sub> O <sub>23</sub> ][Cu(phen)(H <sub>2</sub> O)] <sub>3</sub> ·5H <sub>2</sub> O          | Porous    | 1.67                                                    | 0.23              | $2.2 \times 10^{-5}$        | 301            | 10.1039/c1cc15162b     |
| [In(5TIA) <sub>2</sub> ]·(NH <sub>2</sub> (CH <sub>2</sub> ) <sub>2</sub> )(H <sub>2</sub> O)                          | Porous    | 0.50                                                    | 0.137             | $5.35 \times 10^{-5}$       | 301            | 10.1039/c2cc31527k     |
| [In(13bdc) <sub>2</sub> ]·N(CH <sub>3</sub> ) <sub>4</sub>                                                             | Porous    | 6.69                                                    | 0.47              | $2.2 \times 10^{-4}$        | 301            | 10.1039/c2cc31527k     |
| [Cd(5TIA) <sub>2</sub> ]·2(NH <sub>2</sub> (CH <sub>2</sub> ) <sub>2</sub> )(H <sub>2</sub> O)                         | Porous    | 2.76                                                    | 0.163             | $3.61 \times 10^{-3}$       | 301            | 10.1039/c2cc31527k     |
| (NH <sub>4</sub> ) <sub>4</sub> [MnCr <sub>2</sub> (ox) <sub>6</sub> ]·4H <sub>2</sub> O                               | Porous    | 3.40                                                    | 0.23              | $1.1 \times 10^{-3}$        | 298            | 10.1021/ja206917z      |
| PCMOF-5(98%RH)                                                                                                         | Porous    | 2.75                                                    | 0.19              | $2.5 \times 10^{-3}$        | 333            | 10.1021/ja310435e      |
| PCMOF-5(90%RH)                                                                                                         | Porous    | 3.75                                                    | 0.35              | $2.0 \times 10^{-5}$        | 293            | 10.1021/ja310435e      |
| Prussian blue                                                                                                          | Porous    | 3.33                                                    | 0.22              | $1.2 \times 10^{-3}$        | 293            | 10.1021/ja1003851      |
| [Zn( <i>l</i> -L <sub>Cl</sub> )(Cl)]·2H <sub>2</sub> O                                                                | Porous    | 3.77                                                    | 0.34              | $4.45 \times 10^{-5}$       | 304            | 10.1021/ja2078637      |
| [La(dtmpH <sub>3</sub> )]·7H <sub>2</sub> O                                                                            | Porous    | 4.98                                                    | 0.275             | $8.0 \times 10^{-3}$        | 301            | 10.1039/c2dt11992g     |
| [Ca(135btcH)(H <sub>2</sub> O)]·H <sub>2</sub> O<br><b>Ca-BTC-H<sub>2</sub>O</b>                                       | Porous    | 1.60                                                    | 0.18              | $1.2 \times 10^{-4}$        | 298            | 10.1039/c2cc34006b     |
| Ca-PiPh-tA-I                                                                                                           | Porous    | 3.13                                                    | 0.23              | $5.7 \times 10^{-4}$        | 297            | 10.1021/ja500356z      |
| Ca-PiPh-tA-II                                                                                                          | Porous    | 4.46                                                    | 0.32              | $3.6 \times 10^{-4}$        | 297            | 10.1021/ja500356z      |
| Im@[Al(OH)(14ndc)]                                                                                                     | Anhydrous | 5.63                                                    | 0.6               | $2.2 \times 10^{-5}$        | 393            | 10.1038/nmat2526       |
| Im@[Al(OH)(14bdc)], <b>Im@MIL-53(Al)</b>                                                                               | Anhydrous | 7.13                                                    | 0.9               | $1.0 \times 10^{-7}$        | 393            | 10.1038/nmat2526       |
| His@[Al(OH)(14ndc)]                                                                                                    | Anhydrous | 2.83                                                    | 0.25              | $1.7 \times 10^{-3}$        | 423            | 10.1002/anie.201102997 |
| Tz@βPCMOF2                                                                                                             | Anhydrous | 5.36                                                    | 0.54              | $2.0 \times 10^{-4}$        | 423            | 10/1038/NCHEM.402      |
| [Zn(H <sub>2</sub> PO <sub>4</sub> ) <sub>2</sub> (Tz) <sub>2</sub> ] (Tz = 1,2,4-Triazole)                            | Anhydrous | 6.21                                                    | 0.63              | $1.2 \times 10^{-4}$        | 423            | 10.1021/ja304693r      |

**Table S4** |  $\sigma_0$  and  $E_a$  of classical solid-state proton conductors<sup>a</sup>

| Name                                                                                    | Type              | Conduction path            | $\text{Log}(\sigma_0 / \text{S cm}^{-1} \text{K}^{-1})$ | $E_a / \text{eV}$ | $\sigma / \text{S cm}^{-1}$ | $T / \text{K}$ | Reference (DOI)               |
|-----------------------------------------------------------------------------------------|-------------------|----------------------------|---------------------------------------------------------|-------------------|-----------------------------|----------------|-------------------------------|
| H <sub>2</sub> O (ice)                                                                  | Dense             | Defect                     | 6.57                                                    | 0.576             | $1.0 \times 10^{-7}$        | 260            | 10.1017/CBO9780511524806.004  |
| KH <sub>2</sub> PO <sub>4</sub>                                                         | Dense             | Defect                     | 4.48                                                    | 0.596             | $1.0 \times 10^{-8}$        | 300            | 10.1017/CBO9780511524806.004  |
| KH <sub>2</sub> AsO <sub>4</sub>                                                        | Dense             | Defect                     | 5.99                                                    | 0.686             | $1.0 \times 10^{-8}$        | 300            | 10.1017/CBO9780511524806.004  |
| BYZ = BaZr <sub>0.8</sub> Y <sub>0.2</sub> O <sub>3-δ</sub>                             | Dense             | Defect                     | 6.47                                                    | 0.696             | $1.1 \times 10^{-1}$        | 773            | 10.1038/NMAT2837              |
| β-Alumina (NH <sub>4</sub> <sup>+</sup> )                                               | Dense             | Cation sites               | 5.48                                                    | 0.526             | $1.5 \times 10^{-6}$        | 300            | 10.1017/CBO9780511524806.004  |
| β-Alumina (H <sub>3</sub> O <sup>+</sup> ), dried                                       | Dense             | Cation sites               | 6.34                                                    | 0.826             | $1.0 \times 10^{-10}$       | 300            | 10.1017/CBO9780511524806.004  |
| H <sub>3</sub> O·[Zr <sub>2</sub> (PO <sub>4</sub> ) <sub>3</sub> ], NASICON            | Dense             | Cation sites               | 6.31                                                    | 0.586             | $1.0 \times 10^{-6}$        | 300            | 10.1017/CBO9780511524806.004  |
| (H <sub>3</sub> O) <sub>5</sub> [GdSi <sub>4</sub> O <sub>12</sub> ]                    | Dense             | Cation sites               | 4.97                                                    | 0.506             | $1.0 \times 10^{-6}$        | 300            | 10.1017/CBO9780511524806.004  |
| H <sub>3</sub> O·ClO <sub>4</sub>                                                       | Dense             | Rotational disorder        | 4.31                                                    | 0.316             | $3.4 \times 10^{-4}$        | 300            | 10.1017/CBO9780511524806.004  |
| CsHSO <sub>4</sub> (420K)                                                               | Dense             | Rotational disorder        | 4.89                                                    | 0.356             | $1.0 \times 10^{-2}$        | 420            | 10.1017/CBO9780511524806.004  |
| [H <sub>3</sub> PW <sub>12</sub> O <sub>40</sub> ]·21H <sub>2</sub> O, Polyoxometalate  | Dense             | H <sub>2</sub> O network   | 7.40                                                    | 0.426             | $6.0 \times 10^{-3}$        | 300            | 10.1017/CBO9780511524806.004  |
| [H <sub>3</sub> SiW <sub>12</sub> O <sub>40</sub> ]·28H <sub>2</sub> O, Polyoxometalate | Dense             | H <sub>2</sub> O network   | 8.10                                                    | 0.426             | $3.0 \times 10^{-2}$        | 300            | 10.1017/CBO9780511524806.004  |
| [H <sub>3</sub> PMo <sub>12</sub> O <sub>40</sub> ]·29H <sub>2</sub> O, Polyoxometalate | Dense             | H <sub>2</sub> O network   | 4.66                                                    | 0.176             | $1.7 \times 10^{-1}$        | 300            | 10.1017/CBO9780511524806.004  |
| H <sub>3</sub> O·[UO <sub>2</sub> PO <sub>3</sub> ]·3H <sub>2</sub> O                   | Layered           | Interlayer, water-assisted | 6.46                                                    | 0.376             | $5.0 \times 10^{-3}$        | 301            | 10.1017/CBO9780511524806.004  |
| α-Zr(HPO <sub>4</sub> ) <sub>2</sub> ·H <sub>2</sub> O                                  | Layered           | Interlayer, water-assisted | 2.98                                                    | 0.326             | $1.0 \times 10^{-5}$        | 298            | 10.1002/9781119962502.ch10    |
| Ce(HPO <sub>4</sub> )·3.8H <sub>2</sub> O                                               | Layered           | Interparticle phase        | 2.08                                                    | 0.196             | $2.0 \times 10^{-4}$        | 298            | 10.1017/CBO9780511524806.004  |
| Zeolite A (NH <sub>4</sub> <sup>+</sup> ), 10.8 wt% H <sub>2</sub> O                    | Porous            | Micropores                 | 8.08                                                    | 0.63              | $1.1 \times 10^{-5}$        | 300            | 10.1016/0025-5408(82)90106-4  |
| Nafion <sup>TM</sup>                                                                    | Polymer           | Water channel              | 5.30                                                    | 0.246             | $5.0 \times 10^{-2}$        | 300            | 10.1017/CBO9780511524806.004  |
| BMITf@Nafion                                                                            | Anhydrous polymer | Ionic liquid network       | 4.26                                                    | 0.231             | $1.1 \times 10^{-1}$        | 453            | 10.1149/1.1393153             |
| Imidazole@SPEK                                                                          | Anhydrous polymer | Imidazole network          | 3.80                                                    | 0.282             | $1.3 \times 10^{-1}$        | 473            | 10.1016/S0013-4686(97)10031-7 |
| SnO <sub>2</sub> ·2H <sub>2</sub> O                                                     | Gel               | Interparticle phase        | 2.87                                                    | 0.226             | $4.0 \times 10^{-4}$        | 300            | 10.1017/CBO9780511524806.004  |
| Sb <sub>2</sub> O <sub>5</sub> ·5.4H <sub>2</sub> O                                     | Gel               | Interparticle phase        | 3.47                                                    | 0.186             | $7.5 \times 10^{-3}$        | 300            | 10.1017/CBO9780511524806.004  |
| HClO <sub>4</sub> ·5.5H <sub>2</sub> O (liquid)                                         | Liquid            | H <sub>2</sub> O network   | 3.72                                                    | 0.046             | 3.0                         | 300            | 10.1017/CBO9780511524806.004  |

BMITf = 1-butyl, 3methyl imidaxolium trifluoromethane sulfonate (ionic liquid). SPEK = sulfonated polyetherketone.

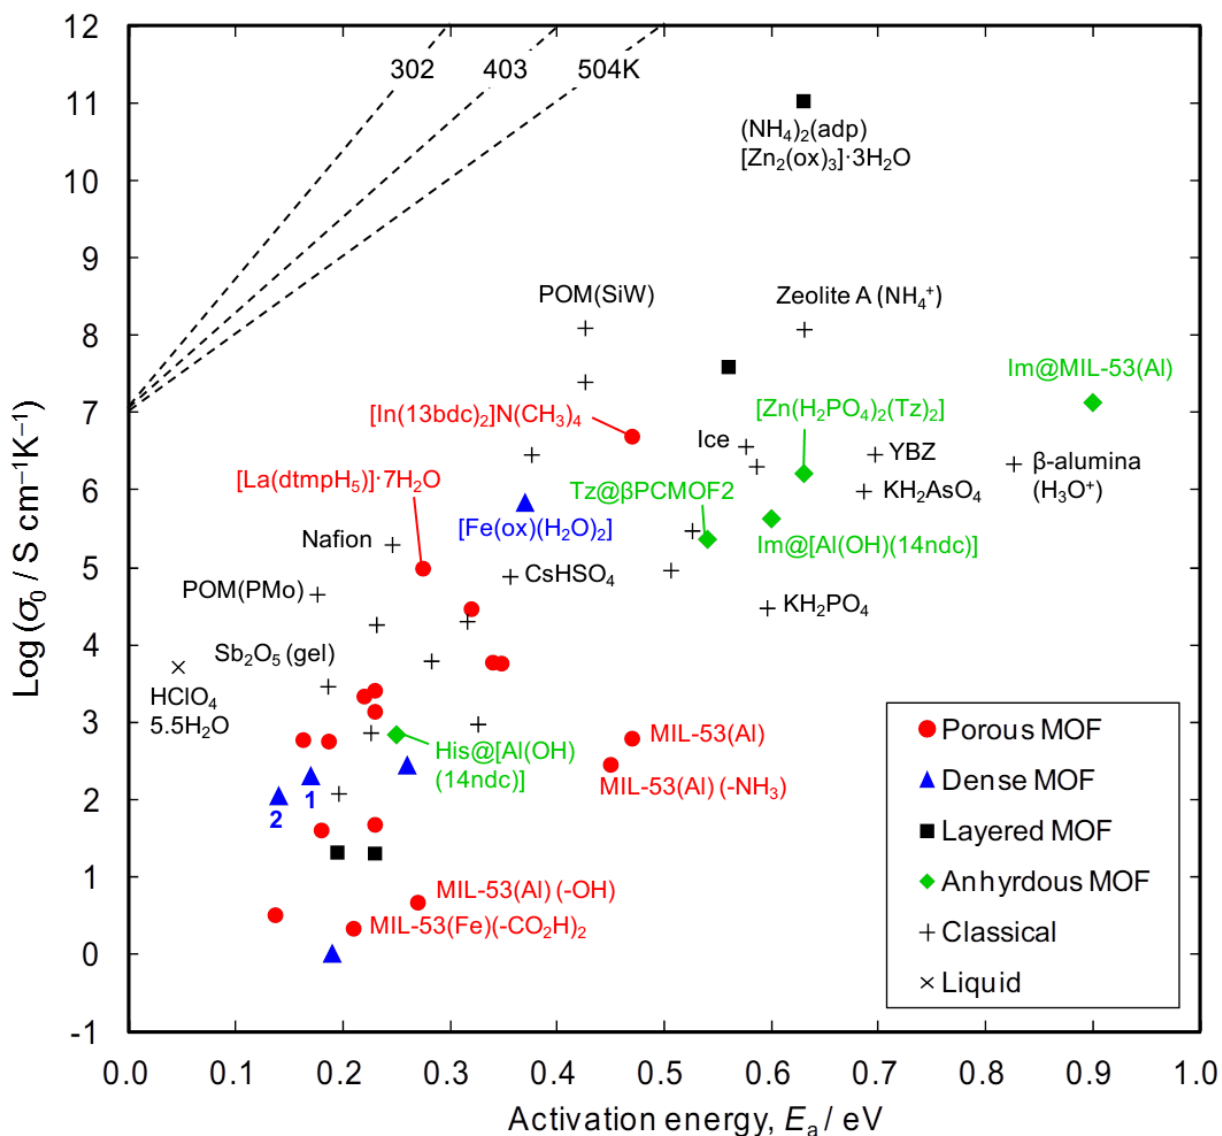

**Figure S10 | Comparison of proton conductivity in metal-organic frameworks (MOFs) and classical solid-state materials.** Relationship between the pre-exponential factor  $\sigma_0$  of the Arrhenius Equation and the activation energy  $E_a$  are plotted. The top left dotted lines show the gradients where conductivity values of different materials are the same (302, 403 and 504 K). MIL-53(M) is  $[M(OH)(14bdc)]$ , where bdc is benzenedicarboxylic acid. Im@, His@ and Tz@ mean incorporation of imidazole, histamine and 1,2,4-triazole molecules, respectively.  $-NH_3$ ,  $-OH$  and  $-CO_2H$  mean functional groups of modified bdc molecules. 14ndc = 1,4-naphthalenedicarboxylic acid. dtmp = hexamethylenediamine tetra(methylenephosphonic acid). adp = adipic acid. POM = polyoxometalate ( $H_3PMo_{12}O_{40} \cdot 29H_2O$  or  $H_3SiW_{12}O_{40} \cdot 28H_2O$ ). YBZ = yttrium-doped barium zirconate.

## S9. Thermogravimetric analyses

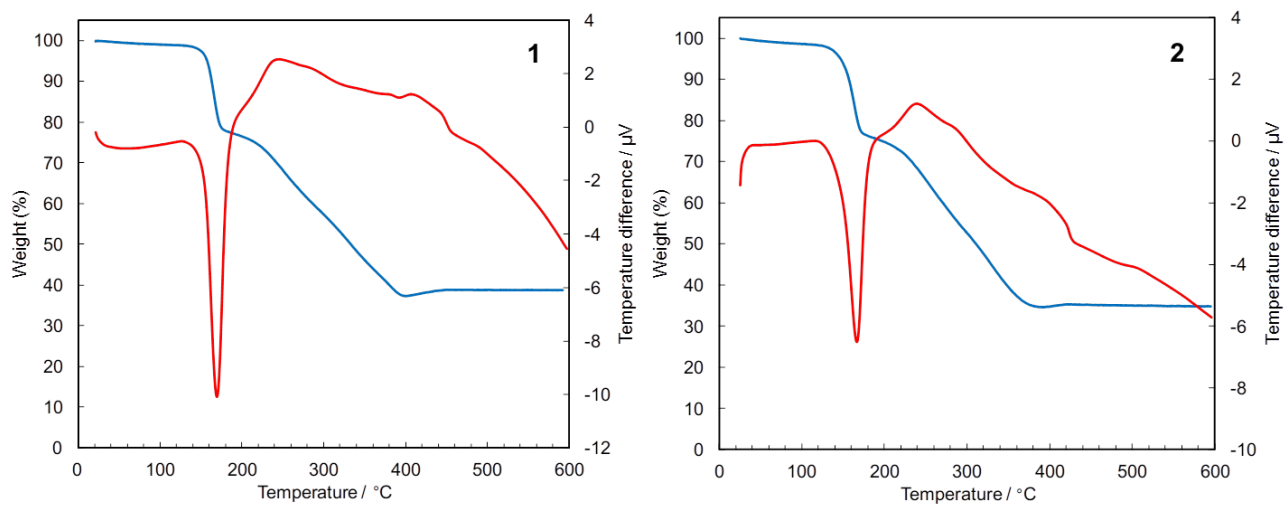

**Figure S11 | Thermogravimetric analysis of  $[\text{Fe}(\text{ox})(\text{H}_2\text{O})_2]$  1 and 2.** Simultaneous differential scanning calorimetry (DSC)-thermogravimetric analysis (TGA) recorded with  $\text{N}_2$  flow of  $100 \text{ mL min}^{-1}$  at scan rate of  $5 \text{ }^\circ\text{C min}^{-1}$ .

## References

1. Echigo T, Kimata M. Single-crystal X-ray diffraction and spectroscopic studies on humboldtine and lindbergite: weak Jahn-Teller effect of Fe<sup>2+</sup> ion. *Physics and Chemistry of Minerals* 2008, **35**(8): 467-475.
2. Tominaka S, Henke S, Cheetham AK. Coordination polymers of alkali metal trithiocyanurates: structure determinations and ionic conductivity measurements using single crystals. *CrystEngComm* 2013, **15**(45): 9400-9407.
3. Toby BH, Von Dreele RB. GSAS-II: the genesis of a modern open-source all purpose crystallography software package. *J Appl Cryst* 2013, **46**: 544-549.
4. Novak A. Hydrogen bonding in solids correlation of spectroscopic and crystallographic data. *Large Molecules*, vol. 18. Springer, 1974, pp 177-216.
5. Potier A. The hydrogen bond and chemical parameters favouring proton mobility in solids. In: Colombari P (ed). *Proton conductors: Solids, membranes and gels (materials and devices)*. Cambridge University Press: Cambridge, 1992, pp 1-17.
6. Bruce PG (ed). *Solid State Electrochemistry*. Cambridge University Press: Cambridge, 1995.
